# Supplementary material for: Chronic arsenate exposure affects amphipod size distribution and reproduction
Source: PeerJ. 2020 Mar 3;8:e8645. doi: 10.7717/peerj.8645 (PMC7059757; doi:10.7717/peerj.8645)
Supplement: Data S1 — 96-hr water-only exposure of L. plumulosus juveniles to arsenate. Five replicates with 20 amphipods per chamber. [file peerj-08-8645-s001.xlsx]

## Sheet: Raw Data
As V Water Only Exposure 96 Hour Test Start Date: July 26, 2004 End date: July 30, 2004
Species: Leptocheirus plumolusos
Leptocheirus were passed through 600 micron mesh but retained on 500 micron mesh.
		# alive	# alive	# alive	# alive	# alive	# dead	Survivorship
As V (ug/L)	Replicate	Day 0	Day 1	Day 2	Day 3	Day 4	Day 4	Day 4
0	A	20	20	20	20	20	0	1
0	B	20	20	20	20	20	0	1
0	C	20	19	18	18	17	1	0.85
0	D	20	19	18	18	15	1	0.75
0	E	20	20	20	20	20	0	1
1000		20	20	20	18	14	3	0.7
1000		20	20	19	19	14	4	0.7
1000		20	21	21	20	16	2	0.8
1000		20	18	19	17	7	9	0.35
1000		20	20	19	17	15	2	0.75
1500		20	20	19	19	15	4	0.75
1500		20	20	19	18	11	7	0.55
1500		20	19	19	17	14	3	0.7
1500		20	20	20	19	16	3	0.8
1500		20	20	19	18	15	3	0.75
2000		20	20	19	19	8	11	0.4
2000		20	19	19	16	2	7	0.1
2000		20	20	19	16	10	3	0.5
2000		20	20	20	19	14	3	0.7
2000		20	20	17	15	15	1	0.75
3000		20	20	20	20	16	4	0.8
3000		20	22	21	21	15	5	0.75
3000		20	20	20	14	5	8	0.25
3000		20	20	18	10	1	4	0.05
3000		20	20	20	16	2	12	0.1
5000		20	19	17	13	1	8	0.05
5000		20	20	20	12	5	4	0.25
5000		20	20	18	2	0	1	0
5000		20	19	12	7	6	1	0.3
5000		20	20	19	8	1	8	0.05
Concentration Replicates A to B (ug/L)	Log Concentration (ug/L)	Survivorship Mean Day 4	SD
0	0	0.92	0.115109
1000	3	0.66	0.178185
1500	3.17609	0.71	0.0961769
2000	3.30103	0.49	0.260768
3000	3.47712	0.39	0.359514
5000	3.69897	0.13	0.135093
