# Supplementary material for: Chronic arsenate exposure affects amphipod size distribution and reproduction
Source: PeerJ. 2020 Mar 3;8:e8645. doi: 10.7717/peerj.8645 (PMC7059757; doi:10.7717/peerj.8645)
Supplement: Data S3 — Survivorship and size structure of the L. plumulosus parental generation exposed to 500 micrograms/L arsenate. Data for weeks 3 and 6. [file peerj-08-8645-s003.xlsx]

## Sheet: Sheet1
Experimental	Duration						# Initial				# Survivors of Parental Cohort				# Final
Treatment	Day of Experiment	Time (week)	Replicate code #	Shelf in incubator	Position on Shelf	Batch	Individuals	>1000	>850	>710	>600	>500	>425	>355	Individuals	Survivorship
Control	21	3	C2	Top	Front	n/a	20	15	0	0	0	0	0	0	15	0.75
Control	21	3	C4	Top	Front	n/a	20	15	1	0	0	0	0	0	16	0.8
Control	21	3	C6	Bottom	Back	n/a	20	13	2	0	0	0	0	0	15	0.75
Control	21	3	C9	Middle	Back	n/a	20	11	2	1	0	0	0	0	14	0.7
Control	21	3	C14	Middle	Front	n/a	20	13	1	0	0	0	0	0	14	0.7
Arsenic	21	3	A2	Middle	Back	n/a	20	6	2	1	0	0	0	0	9	0.45
Arsenic	21	3	A4	Top	Back	n/a	20	14	3	1	0	0	0	0	18	0.9
Arsenic	21	3	A6	Middle	Front	n/a	20	8	2	3	0	0	0	0	13	0.65
Arsenic	21	3	A9	Middle	Back	n/a	20	10	3	1	0	0	0	0	14	0.7
Arsenic	21	3	A14	Top	Back	n/a	20	17	2	1	0	0	0	0	20	1
Control	42	6	C1	Top	Front	A	20	20	0	0	0	0	0	0	20	1
Control	42	6	C7	Middle	Front	A	20	20	0	0	0	0	0	0	20	1
Control	42	6	C10	Middle	Back	A	20	18	0	0	0	0	0	0	18	0.9
Control	42	6	C11	Bottom	Front	A	20	15	0	0	0	0	0	0	15	0.75
Control	42	6	C15	Top	Front	A	20	17	0	0	0	0	0	0	17	0.85
Control	42	6	C3	Top	Front	B	20	16	0	0	0	0	0	0	16	0.8
Control	42	6	C5	Top	Back	B	20	18	0	0	0	0	0	0	18	0.9
Control	42	6	C8	Middle	Back	B	20	16	0	0	0	0	0	0	16	0.8
Control	42	6	C12	Bottom	Back	B	20	17	0	0	0	0	0	0	17	0.85
Control	42	6	C13	Bottom	Back	B	20	13	0	0	0	0	0	0	13	0.65
Arsenic	42	6	A1	Bottom	Front	A	20	16	0	0	0	0	0	0	16	0.8
Arsenic	42	6	A7	Top	Back	A	20	18	0	0	0	0	0	0	18	0.9
Arsenic	42	6	A10	Bottom	Front	A	20	15	0	0	0	0	0	0	15	0.75
Arsenic	42	6	A11	Top	Back	A	20	19	0	0	0	0	0	0	19	0.95
Arsenic	42	6	A15	Top	Front	A	20	15	0	0	0	0	0	0	15	0.75
Arsenic	42	6	A3	Top	Back	B	20	18	0	0	0	0	0	0	18	0.9
Arsenic	42	6	A5	Middle	Back	B	20	9	0	0	0	0	0	0	9	0.45
Arsenic	42	6	A8	Middle	Front	B	20	16	0	0	0	0	0	0	16	0.8
Arsenic	42	6	A12	Middle	Back	B	20	7	0	0	0	0	0	0	7	0.35
Arsenic	42	6	A13	Middle	Front	B	20	11	0	0	0	0	0	0	11	0.55
