# Supplementary material for: Chronic arsenate exposure affects amphipod size distribution and reproduction
Source: PeerJ. 2020 Mar 3;8:e8645. doi: 10.7717/peerj.8645 (PMC7059757; doi:10.7717/peerj.8645)
Supplement: Data S4 — Offspring recruitment and size structure of Leptocheirus plumulosus exposed to 500 micrograms/L for six weeks. Data for weeks 3 and 6. [file peerj-08-8645-s004.xlsx]

## Sheet: Sheet1
Experimental	Duration						# Initial				# Survivors in Offspring Cohort				# Final
Treatment	Day of Experiment	Time (week)	Replicate code #	Shelf in incubator	Position on Shelf	Batch	Individuals	>1000	>850	>710	>600	>500	>425	>355	Individuals
Control	21	3	C2	Top	Front	n/a	20	0	0	0	0	0	0	0	0
Control	21	3	C4	Top	Front	n/a	20	0	0	0	0	1	3	0	4
Control	21	3	C6	Bottom	Back	n/a	20	0	0	0	0	0	0	0	0
Control	21	3	C9	Middle	Back	n/a	20	0	0	0	0	0	0	1	1
Control	21	3	C14	Middle	Front	n/a	20	0	0	0	0	2	6	5	13
Arsenic	21	3	A2	Middle	Back	n/a	20	0	0	0	0	0	0	0	0
Arsenic	21	3	A4	Top	Back	n/a	20	0	0	0	0	0	0	0	0
Arsenic	21	3	A6	Middle	Front	n/a	20	0	0	0	0	1	0	0	1
Arsenic	21	3	A9	Middle	Back	n/a	20	0	0	0	0	0	0	0	0
Arsenic	21	3	A14	Top	Back	n/a	20	0	0	0	0	0	0	0	0
Control	42	6	C1	Top	Front	A	20	37	53	57	61	61	13	7	289
Control	42	6	C7	Middle	Front	A	20	26	88	26	72	73	24	1	310
Control	42	6	C10	Middle	Back	A	20	46	55	47	57	58	29	3	295
Control	42	6	C11	Bottom	Front	A	20	59	61	49	35	36	9	2	251
Control	42	6	C15	Top	Front	A	20	28	136	65	84	84	33	3	433
Control	42	6	C3	Top	Front	B	20	35	68	41	104	104	28	15	395
Control	42	6	C5	Top	Back	B	20	15	63	67	64	64	52	33	358
Control	42	6	C8	Middle	Back	B	20	73	89	74	113	97	102	48	596
Control	42	6	C12	Bottom	Back	B	20	14	33	13	23	5	6	4	98
Control	42	6	C13	Bottom	Back	B	20	25	46	27	28	47	24	1	198
Arsenic	42	6	A1	Bottom	Front	A	20	6	10	40	31	32	10	4	133
Arsenic	42	6	A7	Top	Back	A	20	19	38	45	35	35	47	15	234
Arsenic	42	6	A10	Bottom	Front	A	20	0	1	6	6	6	7	4	30
Arsenic	42	6	A11	Top	Back	A	20	33	23	87	53	52	40	8	296
Arsenic	42	6	A15	Top	Front	A	20	13	14	30	22	22	26	9	136
Arsenic	42	6	A3	Top	Back	B	20	16	22	36	53	49	11	3	190
Arsenic	42	6	A5	Middle	Back	B	20	6	18	22	38	43	15	2	144
Arsenic	42	6	A8	Middle	Front	B	20	6	15	20	14	24	11	12	102
Arsenic	42	6	A12	Middle	Back	B	20	5	7	16	7	9	8	0	52
Arsenic	42	6	A13	Middle	Front	B	20	3	4	5	16	15	9	0	52
