# Supplementary material for: Chronic arsenate exposure affects amphipod size distribution and reproduction
Source: PeerJ. 2020 Mar 3;8:e8645. doi: 10.7717/peerj.8645 (PMC7059757; doi:10.7717/peerj.8645)
Supplement: Data S5 — Parental and offspring sex ratio and % gravid females of Leptocheirus plumulosus exposed to 500 micrograms/L arsenate for six weeks. Data for weeks 3 and 6. [file peerj-08-8645-s005.xlsx]

## Sheet: Chronic Exp. Sex Ratio
Experimental	Duration			Parental Cohort			Offspring Cohort			Parental Cohort		Offspring Cohort
Treatment	Day of Experiment	Time (week)	Replicate code #	Males	Females	Eggbearing	Males	Females	Eggbearing	% female	% gravid females	% female	% gravid females
Control	21	3	C2	7	8	4	0	0	0	0.533333	0.5	.	.
Control	21	3	C4	5	12	6	0	0	0	0.75	0.5	.	.
Control	21	3	C6	9	6	4	0	0	0	0.4	0.666667	.
Control	21	3	C9	4	10	1	0	0	0	0.714286	0.1	.	.
Control	21	3	C14	9	5	2	0	0	0	0.357143	0.4	.	.
Arsenic	21	3	A2	5	3	1	0	0	0	0.333333	0.333333	.	.
Arsenic	21	3	A4	6	11	1	0	0	0	0.611111	0.0909091	.	.
Arsenic	21	3	A6	7	6	1	0	0	0	0.461538	0.166667	.	.
Arsenic	21	3	A9	8	6	0	0	0	0	0.428571	0	.	.
Arsenic	21	3	A14	11	9	0	0	0	0	0.45	0	.	.
Control	42	6	C1	12	8	3	17	20	0	0.4	0.375	0.540541	0
Control	42	6	C7	11	9	7	7	19	0	0.45	0.777778	0.730769	0
Control	42	6	C10	8	10	4	23	23	2	0.555556	0.4	0.5	0.0869565
Control	42	6	C11	10	5	5	11	48	9	0.333333	1	0.813559	0.1875
Control	42	6	C15	7	10	6	15	13	0	0.588235	0.6	0.464286	0
Control	42	6	C3	9	7	5	7	28	9	0.4375	0.714286	0.8	0.321429
Control	42	6	C5	9	9	4	7	8	3	0.5	0.444444	0.533333	0.375
Control	42	6	C8	3	13	9	20	53	11	0.8125	0.692308	0.726027	0.207547
Control	42	6	C12	13	4	1	2	12	9	0.235294	0.25	0.857143	0.75
Control	42	6	C13	7	6	1	12	13	1	0.461538	0.166667	0.52	0.0769231
Arsenic	42	6	A1	10	6	2	1	5	0	0.375	0.333333	0.833333	0
Arsenic	42	6	A7	6	12	7	5	14	1	0.666667	0.583333	0.736842	0.0714286
Arsenic	42	6	A10	9	6	4	0	0	0	0.4	0.666667
Arsenic	42	6	A11	8	11	9	14	19	0	0.578947	0.818182	0.575758	0
Arsenic	42	6	A15	13	2	2	5	8	7	0.133333	1	0.615385	0.875
Arsenic	42	6	A3	9	9	7	2	14	0	0.5	0.777778	0.875	0
Arsenic	42	6	A5	8	1	0	0	6	0	0.111111	0	1	0
Arsenic	42	6	A8	8	8	6	1	5	0	0.5	0.75	0.833333	0
Arsenic	42	6	A12	6	1	1	1	4	4	0.142857	1	0.8	1
Arsenic	42	6	A13	7	4	3	2	1	0	0.363636	0.75	0.333333	0
